# Supplementary material for: Britanin inhibits titanium wear particle‑induced osteolysis and osteoclastogenesis
Source: PubMed Central journal article supplement — Mol Med Rep. 2023 Sep 18;28(5):205. doi: 10.3892/mmr.2023.13092 (PMC10539997; doi:10.3892/mmr.2023.13092), 2023-09-18

Figure S1. Cell viability assay. Macrophages were incubated in macrophage colony-stimulating factor (30 ng/ml) and two different concentrations of britanin for 3 days. Cell viability was assessed using the 3-(4,5-dimethylthiazol-2-yl)-2,5-diphenyl tetrazolium bromide assay. \*P<0.05 and \*\*P<0.01 vs. the untreated group.

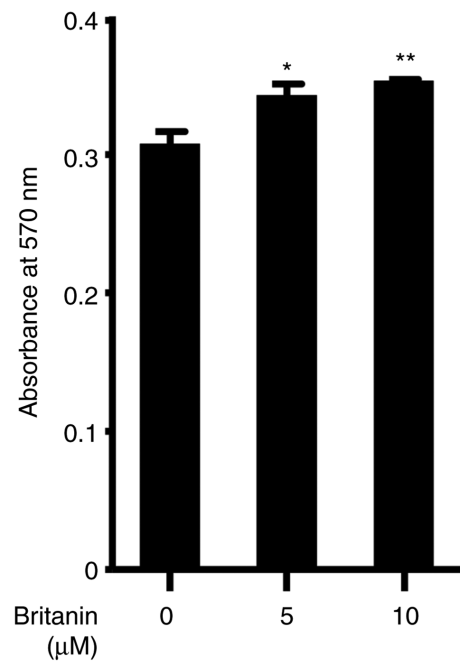

Figure S2. Hematoxylin staining of resorption pits. Bone marrow-derived macrophages were cultured on bone slices to induce osteoclast differentiation. Following 3 days of osteoclast induction, the cells were treated with RANKL with or without britanin for 2 days. Hematoxylin staining was then applied to the bone slices and images were captured using a microscope. Scale bar, 500  $\mu$ m. RANKL, receptor activator of nuclear factor  $\kappa$ B ligand.

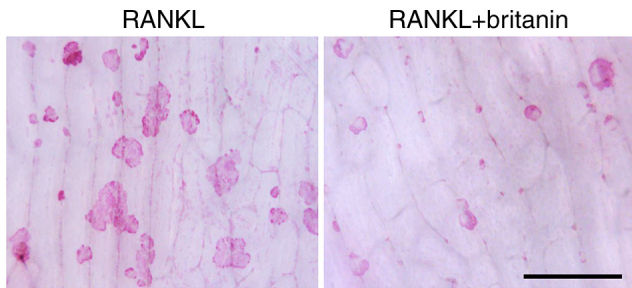

Supplement: Supplementary_Data.pdf [file Supplementary_Data.pdf]
